# Supplementary material for: Targeting Inflammation by Anthocyanins as the Novel Therapeutic Potential for Chronic Diseases: An Update
Source: MDPI journal article supplement (doi:10.3390/molecules26144380), 2021-07-20
Supplement: s1 [file s1]

## Supplementary Materials

Table S1. The summary of (A) clinical trials in particular disorders and (B) meta-analyses.

| A. Clinical trials in particular disorders |                                                                                 |                        |                                                                                                                                         |                                                                                                      |                                             |                         |                                                                                                                                                                                     |                                                                                                                                                                                                                                                                                                                                                                                                                                                                                                               |                                                                   |  |
|--------------------------------------------|---------------------------------------------------------------------------------|------------------------|-----------------------------------------------------------------------------------------------------------------------------------------|------------------------------------------------------------------------------------------------------|---------------------------------------------|-------------------------|-------------------------------------------------------------------------------------------------------------------------------------------------------------------------------------|---------------------------------------------------------------------------------------------------------------------------------------------------------------------------------------------------------------------------------------------------------------------------------------------------------------------------------------------------------------------------------------------------------------------------------------------------------------------------------------------------------------|-------------------------------------------------------------------|--|
| Study (year)                               | Study Design and Comparator (if applicable)                                     | Number of participants | Drug/Substance                                                                                                                          | Dosage [mg/d]                                                                                        | Condition                                   | Treatment/ use duration | Endpoints/Measures                                                                                                                                                                  | Outcomes                                                                                                                                                                                                                                                                                                                                                                                                                                                                                                      | Limitations                                                       |  |
| INFLAMMATION AND CARDIOVASCULAR HEALTH     |                                                                                 |                        |                                                                                                                                         |                                                                                                      |                                             |                         |                                                                                                                                                                                     |                                                                                                                                                                                                                                                                                                                                                                                                                                                                                                               |                                                                   |  |
| Aboonabi (2020a) [89]                      | Randomized control trial                                                        | 47                     | Anthocyanin capsules Medox®, Purified anthocyanin from bilberry ( <i>Vaccinium myrtillus</i> ) and blackcurrant ( <i>Ribes nigrum</i> ) | 2x 160 mg/daily                                                                                      | MetS and healthy subjects, aged 25-75 years | 4 weeks                 | <ul style="list-style-type: none"><li>Cardiometabolic risk factors</li><li>Anti-atherogenicity and anti-platelet activities</li></ul>                                               | <ul style="list-style-type: none"><li>Decreased hs-CRP level (by 28%) in females</li><li>Decreased serum FBG (by 13.3%)</li><li>Reduction in triglyceride (by 24.9%) and LDL-C (by 33.1%)</li><li>No significant differences in serum UA and HDL</li><li>Decreased P-selectin by 40%</li><li>Decreased TNF-<math>\alpha</math> (-28% and -15%), IL-6 (-16.1% and -13.6%), IL-1A (-21.5% and -12.9%), PCAM-1 (-15% and -17.5%), and COX-2(-26% and -27%) in both MetS and control group respectively</li></ul> | Small sample size                                                 |  |
| Aboonabi (2020b) [88]                      | Randomized control trial                                                        | 35                     | Anthocyanin capsules Medox®, Purified anthocyanin from bilberry ( <i>Vaccinium myrtillus</i> ) and blackcurrant ( <i>Ribes nigrum</i> ) | 2x 160 mg/daily                                                                                      | MetS and healthy subjects, aged 25-75 years | 4 weeks                 | <ul style="list-style-type: none"><li>MetS components and the expression of PPAR-<math>\gamma</math>, Nrf2, and NF-<math>\kappa</math>B dependent genes</li></ul>                   | <ul style="list-style-type: none"><li>Decreased FBG (15.7% vs 3.2%), TG(18.2% vs -1.39%), cholesterol (33.5% vs 1.56%) and LDL (28.4% vs -15.6%), serum hs-CRP (-36.3% vs 6.25%) in the MetS compared to Control group</li></ul>                                                                                                                                                                                                                                                                              | The moderate effect of age in the MetS group<br>Small sample size |  |
| Kim (2018) [91]                            | Randomized, double-blind, placebo-controlled clinical trial                     | 37                     | Açaí berries ( <i>Euterpe oleracea</i> Mart.)                                                                                           | Açaí-beverage (containing 1139 mg L-1 gallic acid equivalents of total polyphenolics 2 x325 ml/daily | Individuals with MetS                       | 12 weeks                | <ul style="list-style-type: none"><li>Modulation of lipid and glucose-metabolism, as well as oxidative stress and inflammation</li></ul>                                            | <ul style="list-style-type: none"><li>Decreased plasma IFN-<math>\gamma</math> and urinary level of 8-isoprostane.</li><li>No modification of biomarkers for lipid- and glucose-metabolism</li></ul>                                                                                                                                                                                                                                                                                                          | Small sample size                                                 |  |
| Johnson (2020) [92]                        | Randomized, single-blind, placebo-controlled, parallel-arm pilot clinical trial | 19                     | Montmorency tart cherries ( <i>Prunus cerasus</i> L.)                                                                                   | 2x 240 mL of tart cherry juice/daily                                                                 | Patients with MetS                          | 12 weeks                | <ul style="list-style-type: none"><li>Effects on hemodynamics, arterial stiffness, and blood biomarkers of cardiovascular and metabolic health in men and women with MetS</li></ul> | <ul style="list-style-type: none"><li>OxyLDL and soluble VCAM-1 were significantly lower in Tart Cherry than Control</li><li>Trend for total cholesterol to be lower in Tart Cherry.</li><li>No significant changes were observed in hemodynamics, arterial stiffness, or other blood biomarkers assessed</li></ul>                                                                                                                                                                                           | Small sample size                                                 |  |
| Zhang (2020) [95]                          | Double-blind, randomized controlled trial                                       | 169                    | Anthocyanin capsules Medox®,                                                                                                            | 40mg (n = 44), 80 mg (n = 40), 320 mg (n = 42),                                                      | Dyslipidemic subjects aged 35–70            | 12 weeks                | <ul style="list-style-type: none"><li>8-iso-PGF2<math>\alpha</math></li><li>8-OHdG</li><li>MDA</li></ul>                                                                            | <ul style="list-style-type: none"><li>320 mg/ day anthocyanin supplementation reduced serum IL-6 (–40%), TNF-<math>\alpha</math> (–21%), MDA (–20%) and urine 8-</li></ul>                                                                                                                                                                                                                                                                                                                                    | Blood concentrations of                                           |  |

|                         |                                                           |                        |                                                                                                             |                                                                                             |                                                                                          |                                                                                              |                                                                                                                                                                                                                                                                                                                                  |                                                                                                                                                                                                                                                                                                                                                                                                                                                                                                                                      |                                                                                                                                                                                                                                                                                                                                                                                                                                                                                                                                                                                                                             |                                                     |
|-------------------------|-----------------------------------------------------------|------------------------|-------------------------------------------------------------------------------------------------------------|---------------------------------------------------------------------------------------------|------------------------------------------------------------------------------------------|----------------------------------------------------------------------------------------------|----------------------------------------------------------------------------------------------------------------------------------------------------------------------------------------------------------------------------------------------------------------------------------------------------------------------------------|--------------------------------------------------------------------------------------------------------------------------------------------------------------------------------------------------------------------------------------------------------------------------------------------------------------------------------------------------------------------------------------------------------------------------------------------------------------------------------------------------------------------------------------|-----------------------------------------------------------------------------------------------------------------------------------------------------------------------------------------------------------------------------------------------------------------------------------------------------------------------------------------------------------------------------------------------------------------------------------------------------------------------------------------------------------------------------------------------------------------------------------------------------------------------------|-----------------------------------------------------|
|                         | design with multi-dose interventions                      |                        | Purified anthocyanin from bilberry ( <i>Vaccinium myrtillus</i> ) and blackcurrant ( <i>Ribes nigrum</i> )  | 0 mg (n=43)                                                                                 |                                                                                          |                                                                                              |                                                                                                                                                                                                                                                                                                                                  | <ul style="list-style-type: none"><li>• T-SOD</li><li>• UA</li><li>• IL-6 IL-10</li><li>• TNF-<math>\alpha</math></li><li>• CRP</li></ul>                                                                                                                                                                                                                                                                                                                                                                                            | isoPGF2 $\alpha$ (~37%) and 8-OHdG (~36%) than 80 mg/day and 40 mg/day anthocyanins, and significantly improved T-SOD. <ul style="list-style-type: none"><li>• A slight reduction in serum IL-6, TNF-<math>\alpha</math>, and urine 8-iso-PGF2<math>\alpha</math> from the baseline was observed at 12 weeks in the group receiving 40 mg/day anthocyanins.</li><li>• Anthocyanins (80 mg/day) significantly reduced serum IL-6 (~20%), TNF-<math>\alpha</math> (~11%) and urine 8-iso-PGF2<math>\alpha</math> (~27%)</li><li>• reduced TLR4, and IL-6 mRNA, the protein expression of TLR4, and MYD88 expression</li></ul> | anthocyanins or their metabolites were not measured |
| Santamarina (2020) [96] | Randomized, double-blind, placebo-controlled trial        | 27                     | 5 g of freeze-dried juçara pulp                                                                             | ~131,2 mg of anthocyanins                                                                   | Obese adults aged 31 -59                                                                 | 6 weeks                                                                                      | <ul style="list-style-type: none"><li>• Inflammation gene and protein expression in the monocytes from obese individuals</li><li>• Monocyte cytokines production</li><li>• BP</li><li>• FMD and microvascular perfusion</li><li>• IL-1<math>\beta</math>, IL-6 and TNF-<math>\alpha</math></li><li>• hs-CRP, TC and TG</li></ul> | <ul style="list-style-type: none"><li>• reduced IL-6, TNF-<math>\alpha</math>, and MCP-1 production by monocytes</li><li>• increased IL-10 mRNA, and Ob-R protein levels</li><li>• reduced pIKK<math>\alpha</math>/<math>\beta</math></li><li>• No significant correlations between baseline vascular parameters and inflammatory biomarkers</li><li>• significantly lower hs-CRP and IL-6 concentration 4 h postprandially</li><li>• no significant effects for concentration of IL-6, TNF- <math>\alpha</math> and IL-1b</li></ul> | Short intervention<br>Small sample size                                                                                                                                                                                                                                                                                                                                                                                                                                                                                                                                                                                     |                                                     |
| do Rosario (2021a) [20] | Randomized, double-blind crossover clinical trial         | 16 (13 female, 3 male) | 250 mL of Queen Garnet plum juice (source of anthocyanins-intervention group)<br>Or apricot juice (control) | n/a                                                                                         | Overweight and obese older adults following a high fat high energy (HFHE) meal challenge | 4 days                                                                                       |                                                                                                                                                                                                                                                                                                                                  |                                                                                                                                                                                                                                                                                                                                                                                                                                                                                                                                      | No measures before the start of the 4 day run-in period<br>Small sample size<br>Short observation period                                                                                                                                                                                                                                                                                                                                                                                                                                                                                                                    |                                                     |
| Gamel (2020) [97]       | Randomized, single-blind parallel-arm study               | 29                     | Whole purple and regular wheat                                                                              | Four daily servings                                                                         | Overweight and obese adults with chronic inflammation (hsCRP > 1.0 mg/l)                 | 8 weeks                                                                                      | <ul style="list-style-type: none"><li>• Anthropometrics, blood markers of inflammation, oxidative stress, and lipaemia</li><li>• Metabolites of anthocyanins and phenolic acids</li></ul>                                                                                                                                        | <ul style="list-style-type: none"><li>• Reduction in IL-6 and increase in adiponectin in the purple wheat (PW) group</li><li>• TNF-<math>\alpha</math> was lowered in both groups and ferulic acid concentration increased in the regular wheat (RW) group</li></ul>                                                                                                                                                                                                                                                                 | Not only anthocyanins but also fiber and other phytochemicals                                                                                                                                                                                                                                                                                                                                                                                                                                                                                                                                                               |                                                     |
| Huang (2016) [98]       | 3-arm, single-blind, crossover clinical trial             | 14                     | Strawberry drink                                                                                            | 12 g of freeze-dried strawberry powder which is equivalent to ~1 cup of fresh strawberries. | Overweight healthy adults                                                                | Strawberry drink 2 hours before a standard meal, or with the meal, or 2 hours after the meal | <ul style="list-style-type: none"><li>• Meal-induced postprandial response in inflammation and oxidative stress as well as post-meal insulin responses.</li><li>• The dose-response relationship of strawberries on postprandial glucose and insulin</li><li>• Changes in plasma anthocyanins,</li></ul>                         | <ul style="list-style-type: none"><li>• significant reduction in postprandial glucose when strawberry was consumed before the meal compared to having the strawberry drink with the meal</li><li>• IL-6 was significantly lower after consuming the strawberry drink before the meal</li></ul>                                                                                                                                                                                                                                       | Small sample size<br>Single blinding                                                                                                                                                                                                                                                                                                                                                                                                                                                                                                                                                                                        |                                                     |
| Park (2016) [99]        | Randomized, single-blind, diet-controlled crossover trial | 25                     | FDS- freeze-dried whole strawberry powder rich in anthocyanins (pelargonidin)                               | 0g of FDS 0.04 anthocyanins mg/beverage<br>10g of FDS= 42.2 anthocyanins mg/beverage        | Obese individuals with insulin resistance                                                | One serving with breakfast                                                                   |                                                                                                                                                                                                                                                                                                                                  | <ul style="list-style-type: none"><li>• Postmeal insulin concentrations (6 h) were significantly reduced after the 40-g FDS beverage</li><li>• Postmeal 6 h glucose concentrations were not different</li></ul>                                                                                                                                                                                                                                                                                                                      | Lack of plasma data on other non-anthocyanin strawberry polyphenols and their metabolites                                                                                                                                                                                                                                                                                                                                                                                                                                                                                                                                   |                                                     |

|                                 |                                                    |     |                                                                                                                                         |                                                                                                                                                                           |                                                                       |                                                            |                                                                                                                                         |                                                                                                                                                                                                                                                                                                                                                                                  |                                                                                                                                         |
|---------------------------------|----------------------------------------------------|-----|-----------------------------------------------------------------------------------------------------------------------------------------|---------------------------------------------------------------------------------------------------------------------------------------------------------------------------|-----------------------------------------------------------------------|------------------------------------------------------------|-----------------------------------------------------------------------------------------------------------------------------------------|----------------------------------------------------------------------------------------------------------------------------------------------------------------------------------------------------------------------------------------------------------------------------------------------------------------------------------------------------------------------------------|-----------------------------------------------------------------------------------------------------------------------------------------|
| Nikbakht (2021) [100]           | Open-label clinical trial                          | 40  | Anthocyanin capsules Medox®, Purified anthocyanin from bilberry ( <i>Vaccinium myrtillus</i> ) and blackcurrant ( <i>Ribes nigrum</i> ) | 20g of FDS=87.9 anthocyanins mg/beverage<br>40g of FDS= 154.5 anthocyanins mg/beverage<br><br>320 mg                                                                      | Patients with type T2DM, T2DM-at-risk and healthy individuals 25–75 y | 4 weeks                                                    | • markers of oxidative stress, and inflammation<br><br>• DII<br>• Biomarkers of inflammation<br>• Lipid profile<br>• FBG, UA            | • Pelargonidin-glucuronide was inversely associated with mean insulin concentrations after the 20 and 40 g FDS<br>• OxyLDL was reduced after 20gFDS<br>• IL-6 was not different among treatments<br><br>• Reduction of IL-6, IL-18, and TNF-α in T2DM<br>• Reduction LDL in T2DM-at-risk adults but not in the T2D group<br>• Improved FBG and UA in T2DM-at-risk group          | No additional inflammatory marker assessment associated inflammatory<br><br><br>Small sample size<br>Short duration of the intervention |
| INFLAMMATION AND HEALTHY ADULTS |                                                    |     |                                                                                                                                         |                                                                                                                                                                           |                                                                       |                                                            |                                                                                                                                         |                                                                                                                                                                                                                                                                                                                                                                                  |                                                                                                                                         |
| Jokioja (2020) [119]            | Randomized cross-over trial                        | 17  | Mashed yellow-fleshed potatoes with or without purple potato extract (PPE) rich in acylated anthocyanins and other phenolics            | yellow potatoes with or without purple potato extract (PPE, extracted with water/ethanol/acetic acid) rich in acylated anthocyanins (152 mg) and other phenolics (140 mg) | Healthy men                                                           | Two potato meals and a wash-out time of at least two weeks | • Postprandial inflammation<br>• Glycemic, insulinemic and inflammatory responses                                                       | • Decrease glucose level after the meal<br>• PPE affected some of the studied 90 inflammation markers after meal; for example IL-6, IL-7, VEGF A                                                                                                                                                                                                                                 | Other phenolics were used                                                                                                               |
| Guo (2020) [101]                | Randomized, double-blind, placebo-controlled trial | 107 | Capsules contained 17 different kinds of purified anthocyanins, (mostly delphinidin-3-O-glucosides and cyanidin-3-O-glucosides)         | An increasing dosing schedule of 20, 40, 80, 160, and 320 mg                                                                                                              | Healthy adults aged 18 to 35 y                                        | 14 days                                                    | • FPG<br>• Inflammatory biomarkers (IL-6, IL-10, and TNF-α)<br>• Oxidative markers (8-iso-PGF2a, MDA, TAOC level)                       | • No changes in TNF-α, MDA, TAOC levels<br>• Decreased 8-iso-PGF2a<br>• Significant decreased in FPG in the groups receiving 40, 80 160, and 320 mg/d                                                                                                                                                                                                                            | Healthy status of participants in this study<br>Baseline measures of oxidative stress and inflammation were relatively low              |
| De Liz (2020) [102]             | Randomized cross-over, single-blind clinical trial | 30  | Drink 2 X 100 mL/day of açai or juçara juice rich in anthocyanins and unsaturated fatty acids                                           | Açaí juice = 99.85 mg of anthocyanins / 200 ml<br>Juçara juice= 626.57 of anthocyanins / 200 ml                                                                           | Healthy adults, aged between 19 and 59 y                              | 4 weeks with a 4-week washout                              | • FBG, lipid profile<br>• Oxidative stress biomarkers, TAC,TOS, oxidative stress index (OSI), UA<br>• Activity of the SOD, CAT, and GPx | • Açai and juçara juices increased the HDL-c by 7.7% and 11.4%, respectively<br>• Açai juice intake promoted significant increases in TAC (66.7%), CAT (275.1%), GPx (15.3%), and a decrease in OSI (55.7%) compared to baseline<br>• Juçara juice intake significantly increased CAT activity (~15.0%) in relation to baseline<br>• Açai juice increased the levels of FBG 7.3% | Absence of a control group, Uncontrolled physical activity habits throughout the study                                                  |

|                               |                                                           |    |                                                                                                                                                                                                 |                                                                                                                                                                                                                                                                                                                                                    |                                 |              |                                                                                                                                                                                                                                                           |                                                                                                                                                                                                                                                                                                                           |                                                                                                                                                                                                                                                                                                                         |
|-------------------------------|-----------------------------------------------------------|----|-------------------------------------------------------------------------------------------------------------------------------------------------------------------------------------------------|----------------------------------------------------------------------------------------------------------------------------------------------------------------------------------------------------------------------------------------------------------------------------------------------------------------------------------------------------|---------------------------------|--------------|-----------------------------------------------------------------------------------------------------------------------------------------------------------------------------------------------------------------------------------------------------------|---------------------------------------------------------------------------------------------------------------------------------------------------------------------------------------------------------------------------------------------------------------------------------------------------------------------------|-------------------------------------------------------------------------------------------------------------------------------------------------------------------------------------------------------------------------------------------------------------------------------------------------------------------------|
| Hillman (2021) [120]          | Randomized, double-blind, placebo-controlled trial        | 48 | 1 <sup>st</sup> group: Montmorency tart cherry capsules (CherryPURE®) once or twice daily<br>2 <sup>nd</sup> group: The tart cherry juice once or twice daily<br>3 <sup>rd</sup> group: placebo | Capsules contained 480 mg of freeze-dried tart cherries                                                                                                                                                                                                                                                                                            | Healthy participants            | 2 days       | <ul style="list-style-type: none"> <li>Markers of inflammation: UA, hsCRP</li> <li>Oxidative capacity: ORAC</li> </ul>                                                                                                                                    | <ul style="list-style-type: none"> <li>No significant change in hsCRP or ORAC or between groups</li> <li>Acutely reduced levels of UA up to 8 h post ingestion (an average 8% decrease)</li> </ul>                                                                                                                        | Used a commercially available tart cherry juice not from concentrate that also contained apple juice, which has not been analyzed for phenolic content or ORAC<br>Small sample size<br>Former smokers with different degrees of past smoking<br>Analysis did not capture antioxidant mechanism(s) of aronia consumption |
| Xie (2017) [108]              | Randomized, placebo-controlled trial                      | 49 | 500 mg aronia extract                                                                                                                                                                           | 45.1 mg anthocyanins, 35.7 mg hydroxycinnamic acids, and 41.9 mg proanthocyanidins per 500-mg dose                                                                                                                                                                                                                                                 | Healthy adult former smokers    | 12 weeks     | <ul style="list-style-type: none"> <li>Biomarkers of cardiovascular disease risk, inflammation, and oxidative stress in former smokers</li> <li>Plasma lipids, blood pressure, and lipid transport genes of peripheral blood mononuclear cells</li> </ul> | <ul style="list-style-type: none"> <li>No change in BP or biomarkers of inflammation and oxidative stress</li> <li>Reduction in FBG, TC by 8%, LDL-C by 11%, and LDL receptor protein in peripheral blood mononuclear cells</li> </ul>                                                                                    | Other macro- and micronutrients may interfere                                                                                                                                                                                                                                                                           |
| Anuyahong (2020) [103]        | Randomized-crossover trial with a one-week washout period | 19 | Yogurt enriched with anthocyanins from Riceberry Rice ( <i>Oryza sativa</i> L.)                                                                                                                 | 17.4 mg of cyanidin-3-glucoside and 7.9 mg Peonidin-3-glucoside per serving<br>500 g of sour cherries containing 346.5 mg of total anthocyanins or 500 g of anthocyanin-free apples everyday<br>Group A anthocyanins (60 mg/d);<br>Group X xanthophylls (6 mg lutein + 2 mg zeaxanthin/d)<br>Group A+X anthocyanins (60 mg/d) + xanthophylls (6 mg | Healthy subject aged 18 to 40 y | One serving, | <ul style="list-style-type: none"> <li>Postprandial glucose level</li> <li>Plasma antioxidant capacity</li> <li>MDA</li> </ul>                                                                                                                            | <ul style="list-style-type: none"> <li>Reduction in the postprandial glucose excursion (40.23%)</li> <li>Acute increase in FRAP, TEAC, and ORAC</li> <li>Reduction in plasma MDA</li> </ul>                                                                                                                               | Short duration<br>Analysis only fasting blood samples                                                                                                                                                                                                                                                                   |
| Bialasie-wicz (2018) [104]    | Randomized placebo-controlled trial                       | 63 | Sour Cherries                                                                                                                                                                                   | 500 g of sour cherries containing 346.5 mg of total anthocyanins or 500 g of anthocyanin-free apples everyday<br>Group A anthocyanins (60 mg/d);<br>Group X xanthophylls (6 mg lutein + 2 mg zeaxanthin/d)<br>Group A+X anthocyanins (60 mg/d) + xanthophylls (6 mg                                                                                | Healthy subject                 | 30 days      | <ul style="list-style-type: none"> <li>Inflammatory response and oxidative stress: LBCL (reflecting oxidants generation by circulating phagocytes)</li> </ul>                                                                                             | <ul style="list-style-type: none"> <li>Sour cherries inhibited median resting LBCL (by 29.5% and 33.7%) and resting and agonist (fMLP)-induced LBCL (by 24.7% and 32.3%) after 30-day consumption and after 10-day wash-out</li> </ul>                                                                                    | Lack of placebo group<br>No dietary recommendations or control                                                                                                                                                                                                                                                          |
| Estévez-Santiago (2019) [107] | Randomized control trial                                  | 72 | Anthocyanins, xanthophylls, or both groups of bioactives together                                                                                                                               | 500 g of sour cherries containing 346.5 mg of total anthocyanins or 500 g of anthocyanin-free apples everyday<br>Group A anthocyanins (60 mg/d);<br>Group X xanthophylls (6 mg lutein + 2 mg zeaxanthin/d)<br>Group A+X anthocyanins (60 mg/d) + xanthophylls (6 mg                                                                                | Postmenopausal Women            | 8 months     | <ul style="list-style-type: none"> <li>Inflammatory, antioxidant, and cardiometabolic parameters</li> </ul>                                                                                                                                               | <ul style="list-style-type: none"> <li>No changed in SBP, DBP, BP, CRP, IL-6, VCAM-1, IAM-1, MCP-1-1 or MMP-2, and MMP-9</li> <li>Decreased plasma glucose levels and the plasma metabolomic profile by all three dietary supplementations</li> <li>No synergistic effect between the two groups of bioactives</li> </ul> | No dietary recommendations or control                                                                                                                                                                                                                                                                                   |

|                          |                                                             |    |                                                                                                                                   |                                                                                                                                                     |                                                        |              |                                                                                                                                                                                                                                                                                                                                                                        |                                                                                                                                                                                                                                                                             |                                                                                                                                                                                                       |
|--------------------------|-------------------------------------------------------------|----|-----------------------------------------------------------------------------------------------------------------------------------|-----------------------------------------------------------------------------------------------------------------------------------------------------|--------------------------------------------------------|--------------|------------------------------------------------------------------------------------------------------------------------------------------------------------------------------------------------------------------------------------------------------------------------------------------------------------------------------------------------------------------------|-----------------------------------------------------------------------------------------------------------------------------------------------------------------------------------------------------------------------------------------------------------------------------|-------------------------------------------------------------------------------------------------------------------------------------------------------------------------------------------------------|
| Pekas (2021) [105]       | Randomized, double-blind, placebo-controlled clinical trial | 18 | Anthocyanins from hawthorn berry extract ( <i>Crataegus</i> spp.) and tart cherry powder ( <i>Prunus cerasus</i> ), and bromelain | lutein + 2 mg zeaxanthin/d)<br>Two capsules with a total of 465, 480 and 400 mg of hawthorn extract, tart cherry powder and bromelain, respectively | Healthy adults<br>Mean age 24                          | One serving, | <ul style="list-style-type: none"> <li>Impacts on endothelial function, BP, TAC, and OUC</li> <li>Brachial artery FMD, and fatigability were measured</li> </ul>                                                                                                                                                                                                       | <ul style="list-style-type: none"> <li>Increased FMD, TAC</li> <li>Reduced SBP</li> <li>Improved OUC</li> <li>Tissue saturation and oxygenated Hb significantly increased, while deoxygenated Hb significantly decreased</li> </ul>                                         | Mixes of substances have been used                                                                                                                                                                    |
| NEUROINFLAMMATION        |                                                             |    |                                                                                                                                   |                                                                                                                                                     |                                                        |              |                                                                                                                                                                                                                                                                                                                                                                        |                                                                                                                                                                                                                                                                             |                                                                                                                                                                                                       |
| Kent (2017) [113]        | Randomized controlled trial                                 | 49 | Anthocyanin-rich cherry juice                                                                                                     | 200 ml/day of cherry juice (intervention arm) (138 mg of anthocyanins) or 200 ml/day of commercially prepared apple juice (control arm)             | Older adults (+70 year) with mild-to-moderate dementia | 12 weeks     | <ul style="list-style-type: none"> <li>Cognitive function</li> <li>BP</li> <li>Anti-inflammatory effects</li> </ul>                                                                                                                                                                                                                                                    | <ul style="list-style-type: none"> <li>CRP and IL-6 not altered</li> <li>Improvements in verbal fluency, short-term memory and long-term memory</li> <li>Reduction in systolic SB</li> </ul>                                                                                | Small sample size<br>Short intervention length                                                                                                                                                        |
| do Rosario (2021b) [112] | Randomized, double-blind, controlled clinical trial         | 31 | The high-anthocyanins juice containing queen garnet plum                                                                          | 250 mL fruit juice daily<br>(1) 201 mg<br>(2) 47 mg<br>(3) 0 mg                                                                                     | Older participants with MCI mean age 75.3              | 8 weeks      | <ul style="list-style-type: none"> <li>microvascular function,</li> <li>24-h ABP</li> <li>inflammatory biomarkers</li> </ul>                                                                                                                                                                                                                                           | <ul style="list-style-type: none"> <li>Decreased TNF-<math>\alpha</math> in group that received the higher dose of anthocyanins</li> <li>Anthocyanins did not alter other inflammatory biomarkers, microvascular function or blood pressure parameters</li> </ul>           | The average mean intake of anthocyanins in the low dose group in the usual diet of participants was similar to the intervention                                                                       |
| Bowtell (2017) [114]     | Randomized, double-blind, controlled clinical trial         | 26 | 30 mL blueberry concentrate                                                                                                       | 387 mg anthocyanidins (34 mg malvidin, 108 mg cyanidin, 41 mg pelargonidin, 63 mg peonidin, 86 mg delphinidin, and 55 mg petunidin)                 | Healthy older                                          | 12 weeks     | <ul style="list-style-type: none"> <li>Brain perfusion, task-related activation, and cognitive function</li> <li>5 cognitive domains: attention, memory, verbal fluency, language, and visuospatial abilities</li> <li>Brain perfusion was determined using an arterial spin labelling technique, and blood biomarkers of inflammation and oxidative stress</li> </ul> | <ul style="list-style-type: none"> <li>Improvement in working memory</li> <li>Increased resting-state cerebral perfusion in the parietal and occipital lobes</li> <li>Serum of BDNF concentration was not affected</li> <li>Supplementation did not affect hsCRP</li> </ul> | Small sample size<br>Blood samples were not taken in a fasted state which may introduce significant variation and confounding, since feeding status has been shown to affect serum BDNF concentration |
| INSOMNIA                 |                                                             |    |                                                                                                                                   |                                                                                                                                                     |                                                        |              |                                                                                                                                                                                                                                                                                                                                                                        |                                                                                                                                                                                                                                                                             |                                                                                                                                                                                                       |

|                                    |                                                     |        |                                                      |                                                |                                            |         |                                                                                                                                                                                                                                                                                                                      |                                                                                                                                                                                                                                                                                                                                      |                                                                                                    |
|------------------------------------|-----------------------------------------------------|--------|------------------------------------------------------|------------------------------------------------|--------------------------------------------|---------|----------------------------------------------------------------------------------------------------------------------------------------------------------------------------------------------------------------------------------------------------------------------------------------------------------------------|--------------------------------------------------------------------------------------------------------------------------------------------------------------------------------------------------------------------------------------------------------------------------------------------------------------------------------------|----------------------------------------------------------------------------------------------------|
| Losso (2018) [117]                 | Placebo-controlled, balanced, crossover pilot study | 8      | Cherry juice                                         | 240 ml twice a day                             | Subjects >50 years of age and insomnia     | 2 weeks | <ul style="list-style-type: none"> <li>Sleep was evaluated by polysomnography and 5 validated questionnaires</li> <li>Serum IDO, the kynurenine to tryptophan ratio, and PGE-2</li> <li>In vitro, Caco-2 cells were stimulated with IFN-<math>\gamma</math> and the stimulates inflammation was measured.</li> </ul> | <ul style="list-style-type: none"> <li>Increased sleep time by 84 minutes</li> <li>Sleep efficiency increased on the Pittsburgh Sleep Quality Index</li> <li>The serum kynurenine to tryptophan ratio decreased, as did the level of PGE-2</li> <li>In vitro, cherry juice procyanidin B-2 dose-dependently inhibited IDO</li> </ul> | Small sample                                                                                       |
| INFLAMMATION AND PHYSICAL ACTIVITY |                                                     |        |                                                      |                                                |                                            |         |                                                                                                                                                                                                                                                                                                                      |                                                                                                                                                                                                                                                                                                                                      |                                                                                                    |
| Arevström (2019) [115]             | Randomized, open-label, clinical trial              | 50     | Freeze-dried bilberry ( <i>Vaccinium myrtillus</i> ) | 40 g/d, equivalent to 480 g fresh bilberries   | Patients after acute myocardial infarction | 8 weeks | <ul style="list-style-type: none"> <li>Cardiovascular risk markers and exercise capacity</li> </ul>                                                                                                                                                                                                                  | <ul style="list-style-type: none"> <li>No difference in hsCRP</li> <li>The mean 6-minute walk test distance increased significantly more in the bilberry Ex vivo OxyLDL was significantly lowered in the bilberry</li> <li>TC and LDL no differ</li> </ul>                                                                           | open-label design is methodologically weaker                                                       |
| Hutchison (2016) [109]             | Randomized, placebo, control trial                  | 16     | Black currant nectar (BCN)                           | 16 oz of BCN or a placebo twice a day          | College students                           | 8 days  | <ul style="list-style-type: none"> <li>Symptoms of exercise-induced muscle damage</li> <li>Blood markers of muscle damage, inflammation and ORAC</li> </ul>                                                                                                                                                          | <ul style="list-style-type: none"> <li>Consumption of BCN reduced CK levels</li> <li>The change in IL-6 was higher in the placebo group post exercise</li> <li>The change in ORAC levels was higher in the treatment group at 48 h post exercise</li> </ul>                                                                          | Small sample size                                                                                  |
| McCornick (2016) [121]             | Randomized, double-blind, controlled clinical trial | 9 male | Tart Montmorency cherries ( <i>Prunus Cerasus</i> )  | 90 mL daily of tart Montmorency CJ concentrate | Well-trained male Water Polo players       | 6 days  | <ul style="list-style-type: none"> <li>Markers of inflammation and oxidative stress (IL-6, CRP C, UA, F2-IsoP)</li> </ul>                                                                                                                                                                                            | <ul style="list-style-type: none"> <li>Lack of difference observed in the blood markers between groups</li> </ul>                                                                                                                                                                                                                    | The anthocyanin concentration of both the commercial and placebo supplement used was not confirmed |
| CHRONIC KIDNEY DISEASES            |                                                     |        |                                                      |                                                |                                            |         |                                                                                                                                                                                                                                                                                                                      |                                                                                                                                                                                                                                                                                                                                      |                                                                                                    |
| Lopes 2018) [116]                  | Randomized, simple blind, clinical study            | 58     | Extruded sorghum breakfast meal                      | n/a                                            | Patients with chronic kidney disease       | 7 weeks | <ul style="list-style-type: none"> <li>Inflammation and oxidative stress markers</li> </ul>                                                                                                                                                                                                                          | <ul style="list-style-type: none"> <li>decreased CRP, MDA</li> <li>increased the TAC and SOD enzyme</li> </ul>                                                                                                                                                                                                                       | Mixes of substances (tannin, anthocyanin, and dietary fiber and probiotic)                         |
| B. META-ANALYSES                   |                                                     |        |                                                      |                                                |                                            |         |                                                                                                                                                                                                                                                                                                                      |                                                                                                                                                                                                                                                                                                                                      |                                                                                                    |

| Study (year)            | Study Design and Comparator (if applicable)   | Number of trials (subjects) | Drug/Substance                                                                                                                                                     | Dosage [mg/d]                              | Condition                                                                               | Treatment/ use duration                                         | Endpoints/Measures                                                                                  | Outcomes                                                                                                                                                                                                                                                                                         | Limitations                                                                                                                                                                                                                         |
|-------------------------|-----------------------------------------------|-----------------------------|--------------------------------------------------------------------------------------------------------------------------------------------------------------------|--------------------------------------------|-----------------------------------------------------------------------------------------|-----------------------------------------------------------------|-----------------------------------------------------------------------------------------------------|--------------------------------------------------------------------------------------------------------------------------------------------------------------------------------------------------------------------------------------------------------------------------------------------------|-------------------------------------------------------------------------------------------------------------------------------------------------------------------------------------------------------------------------------------|
| Sangsefidi (2018) [122] | Meta-analysis of randomized controlled trials | 7 trials (489 subjects)     | purified anthocyanins or anthocyanin-rich extract supplementationPurified anthocyanins, elderberry, chokeberry, <i>Arctostaphylos</i> L. and aronia berry extracts | Dose of anthocyanins from 45.1 to 640 mg/d | Healthy and unhealthy participants (Patients with hyperlipidemia, Pre-hypertensive men) | 3 to 12 weeks                                                   | • CRP levels                                                                                        | • Anthocyanins had no significant impact on CRP levels regarding healthy participants, patients and types of anthocyanins                                                                                                                                                                        | Various assay methods used to determine CRP                                                                                                                                                                                         |
| Rahmani (2019) [123]    | Meta-analysis of randomized controlled trials | 7 trials (286 subjects)     | Mean dose of aronia supplementation of 228 ml (juice) or mg (supplement) per day (100–500 ml or mg/day)                                                            | n/a                                        | MetS, handball players, healthy individuals, patient after Myocardial Infraction        | Mean duration of the interventions was 16 weeks (4 to 24 weeks) | • changes in lipid profile, SBP and DBP, inflammation<br>• biomarkers: CRP, IL-6, and TNF- $\alpha$ | • No significant effect on SBP, CRP, IL-1 and TNF- $\alpha$<br>• Increased high-density HDL and DBP.<br>• Reduced TGs levels when dose of Aronia was increased to 300 mg/day<br>• Reduction in total cholesterol and LDL                                                                         | Results did not show any difference between consumption level of aronia juice and aronia supplementation<br>Different sources of dietary anthocyanins that vary in composition as well as the contents of other bioactive compounds |
| Fallah (2020) [124]     | Meta-analysis of randomized controlled trials | 32 trials (1744 subjects)   | Anthocyanins supplements, and anthocyanins derived from fruit                                                                                                      | Dose of anthocyanins from 32 to 1323 mg/d  | MetS, obese, prediabetes, diabetes, and healthy individuals                             | Duration of the interventions 3 to 24 weeks                     | • Markers of systemic and vascular inflammation                                                     | • significantly decreased levels of CRP, IL-6, TNF- $\alpha$ , IAM-1 and VCAM-1<br>• Increased level of adiponectin<br>• No change in levels(IL-1 $\beta$ and P-selectin<br>• Higher doses of anthocyanins (>300 mg/day) significantly decreased levels of CRP, IL-6, TNF- $\alpha$ , and VCAM-1 |                                                                                                                                                                                                                                     |

8-iso-PGF $2\alpha$ — 8-isoprostaglandin F $2\alpha$ , 8-OHdG— 8-hydroxy-2'-deoxyguanosine, ABP— ambulatory blood pressure, BDNF— brain-derived neurotrophic factor, BP— blood pressure, CAT— catalase, COX-2—cyclooxygenase-2, DBP— diastolic blood pressure, DII— dietary inflammatory index F2-IsoP— F2-Isoprostane, FBG— fasting blood glucose, FMD— flow-mediated dilation, fMLP-LBCL— fMLP-induced luminol-enhanced whole blood chemiluminescence, GPx— glutathione peroxidase, Hb— hemoglobin, HDL— high-density lipoprotein, hs-CRP— high sensitivity C-reactive protein, IAM-1— intercellular adhesion molecule-1, IFN- $\gamma$ — interferon gamma, IL—interleukin, LBCL— luminol-enhanced whole blood chemiluminescence, LDL-C— low-density lipoprotein cholesterol, MCI— mild cognitive impairment, MCP-1— monocyte chemotactic protein 1, MetS— metabolic syndrome, MDA— malonaldehyde, MMP— matrix metalloproteinase, MYD88— myeloid differentiation 88, n/a— not available or not applicable, NF- $\kappa$ B— nuclear-factor  $\kappa$ B, Nrf2— nuclear factor erythroid 2-related factor 2, Ob-R— leptin receptors, ORAC— oxygen radical absorbance capacity, OSI— oxidative stress index, OUC— oxygen utility capacity, OxyLDL— oxidized low-density lipoprotein, PCAM-1— platelet endothelial cell adhesion molecule-1, PGE-2— prostaglandin E2, pIKK— phosphorylated inhibitor of  $\kappa$ B kinase, PPAR- $\gamma$ — peroxisome proliferator-activated receptors gamma, PPE— purple potato extract, SBP— systolic blood pressure, SOD— superoxide dismutase, T2DM— type 2 diabetes mellitus, TAC— total antioxidant capacity, TEAC— Trolox equivalent antioxidant capacity, TOS— total oxidant status, TG— triglyceride, TLR4— toll-like receptor 4, TNF- $\alpha$ — tumor necrosis factor- $\alpha$ , T-SOD— total superoxide dismutase, UA— uric acid, VCAM-1— vascular cell adhesion molecule-1, VEGF— vascular endothelial growth factor
